# Supplementary material
Source: PubMed Central journal article supplement (PMC6066193)
Supplement: Supp_Fig1.pdf [file Supp_Fig1.pdf]

## Supplementary Data

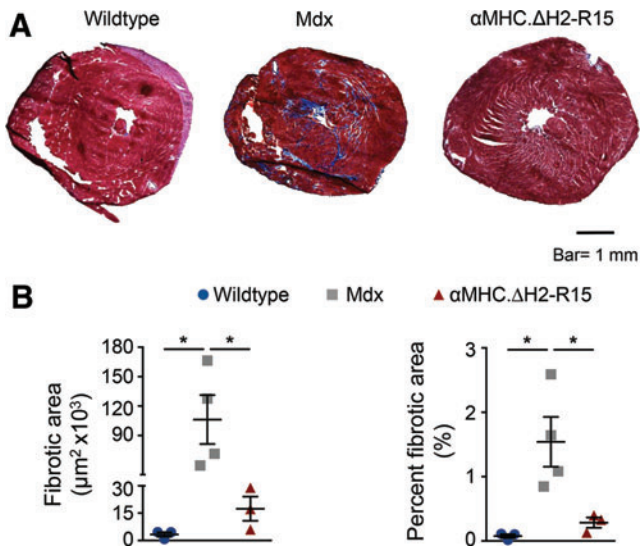

**Supplementary Figure S1.** Myocardial fibrosis is significantly reduced in  $\alpha$ MHC. $\Delta$ H2-R15 transgenic mice. **(A)** Representative photomicrographs of whole heart cross-section of Masson trichrome staining. **(B)** Quantification of the fibrotic area in each strain. The *left panel* shows the absolute area of fibrotic area in the heart, and the *right panel* shows the percentage of fibrotic area in the whole heart cross-section.
